# Supplementary material for: Body Mass Index Trajectory and Outcome Post Fontan Procedure
Source: PubMed Central journal article supplement — J Am Heart Assoc. 2022 Sep 8;11(18):e025931. doi: 10.1161/JAHA.122.025931 (PMC9683651; doi:10.1161/jaha.122.025931), 2022-09-08
Supplement: JAH3-11-e025931-s001.pdf [file JAH3-11-e025931-s001.pdf]

# Supplemental Material

**Table S1. Frequency of clinical outcome by BMI category at most recent follow-up in paediatric patients.**

|                                                              | <b>Total<br/>N=358<br/>(N (%))</b> | <b>Underweight<br/>N=34<br/>(N (%))</b> | <b>Normal<br/>N=256<br/>(N (%))</b> | <b>Overweight<br/>N=34<br/>(N (%))</b> | <b>Obese<br/>N=34<br/>(N<br/>(%))</b> | <b>P-<br/>Value</b> |
|--------------------------------------------------------------|------------------------------------|-----------------------------------------|-------------------------------------|----------------------------------------|---------------------------------------|---------------------|
| Deceased                                                     | 13 (4)                             | 1 (3)                                   | 9 (4)                               | 2 (6)                                  | 1 (3)                                 | 0.95                |
| Age Deceased<br>(Years)<br>(Median<br>(IQR))                 | 14 (6,<br>19)                      | 19 (19, 19)                             | 10 (5,<br>14)                       | 25 (25, 25)                            | 13<br>(13,<br>13)                     | 0.24                |
| Transplant                                                   | 2 (1)                              | 0                                       | 2 (1)                               | 0                                      | 0                                     | 1.00                |
| Takedown                                                     | 2 (1)                              | 0                                       | 2 (1)                               | 0                                      | 0                                     | 1.00                |
| NYHA III/IV                                                  | 9 (3)                              | 2 (6)                                   | 5 (2)                               | 2 (6)                                  | 0                                     | 0.19                |
| Severe Fontan<br>Failure                                     | 23 (6)                             | 3 (9)                                   | 15 (6)                              | 4 (12)                                 | 1 (3)                                 | 0.39                |
| Age Severe<br>Fontan Failure<br>(Years)<br>(Median<br>(IQR)) | 7 (4, 14)                          | 9.5 (5, 16)                             | 6 (4,<br>14)                        | 16 (5.5, 25)                           | 13<br>(13,<br>13)                     | 0.65                |

*P*-value indicates comparison between paediatric BMI groups.

**Table S2. Frequency of clinical outcome by BMI at most recent follow-up in adult patients.**

|                                                           | <b>Total<br/>N=138<br/>(N<br/>(%))</b> | <b>Underweight<br/>N=11<br/>(N (%))</b> | <b>Normal<br/>N=74<br/>(N (%))</b> | <b>Overweight<br/>N=37<br/>(N (%))</b> | <b>Obese<br/>N=16<br/>(N<br/>(%))</b> | <b>P-<br/>Value</b> |
|-----------------------------------------------------------|----------------------------------------|-----------------------------------------|------------------------------------|----------------------------------------|---------------------------------------|---------------------|
| Deceased                                                  | 11 (8)                                 | 1 (9)                                   | 5 (7)                              | 3 (8)                                  | 2 (13)                                | 0.7                 |
| Age Deceased<br>(Years)<br>(Median (IQR))                 | 30<br>(22,<br>32)                      | 31 (31, 31)                             | 22 (21,<br>32)                     | 30 (24, 35)                            | 31.5<br>(26,<br>37)                   | 0.61                |
| Transplant                                                | 9 (7)                                  | 0                                       | 5 (7)                              | 4 (11)                                 | 0                                     | 0.51                |
| Takedown                                                  | 1 (1)                                  | 1 (9)                                   | 0                                  | 0                                      | 0                                     | 0.08                |
| NYHA III/IV                                               | 9 (7)                                  | 0                                       | 6 (8)                              | 2 (5)                                  | 1 (6)                                 | 0.95                |
| Venous<br>Thromboembolism                                 | 36<br>(31)                             | 3 (43)                                  | 21 (34)                            | 8 (24)                                 | 4 (27)                                | 0.65                |
| Severe Fontan<br>Failure                                  | 23<br>(17)                             | 2 (18)                                  | 11 (15)                            | 7 (19)                                 | 3 (19)                                | 0.87                |
| Age Severe<br>Fontan Failure<br>(Years)<br>(Median (IQR)) | 26<br>(19,<br>31)                      | 23 (15, 31)                             | 25 (19,<br>27)                     | 26 (14, 34)                            | 37<br>(26,<br>39)                     | 0.25                |

*P*-value indicates comparison between adult BMI groups.

**Table S3. Baseline characteristics of patients by BMI<sub>6-60month</sub> trajectory.**

|                                 |                                                                                           | <b>Total<br/>N=463<br/>(N (%))</b> | <b>Lower<br/>N=154<br/>(N (%))</b> | <b>Middle<br/>N=234<br/>(N (%))</b> | <b>Upper<br/>N=75<br/>(N (%))</b> | <b>P-<br/>Value</b> |
|---------------------------------|-------------------------------------------------------------------------------------------|------------------------------------|------------------------------------|-------------------------------------|-----------------------------------|---------------------|
| Sex                             | Male                                                                                      | 295 (64)                           | 51 (33)                            | 181<br>(77)                         | 63 (84)                           | <<br>0.01           |
|                                 | Female                                                                                    | 168 (36)                           | 103 (67)                           | 53 (23)                             | 12 (16)                           |                     |
| Birthweight (kg)<br>(Mean ± SD) |                                                                                           | 3.26 ±<br>0.61                     | 3.13 ±<br>0.59                     | 3.32 ±<br>0.61                      | 3.33 ±<br>0.62                    | 0.13                |
| Ventricular<br>Morphology       | Left                                                                                      | 231 (50)                           | 80 (52)                            | 114<br>(49)                         | 37 (49)                           | 0.78                |
|                                 | Right                                                                                     | 174 (38)                           | 53 (34)                            | 19 (8)                              | 27 (36)                           |                     |
|                                 | Biventricular                                                                             | 38 (8)                             | 12 (8)                             | 19 (8)                              | 7 (9)                             |                     |
|                                 | Indeterminate                                                                             | 14 (3)                             | 7 (5)                              | 5 (2)                               | 2 (3)                             |                     |
| Isomerism/<br>Heterotaxy        | None                                                                                      | 422 (91)                           | 136 (88)                           | 215<br>(92)                         | 71 (85)                           | 0.37                |
|                                 | Left Atrial<br>Isomerism                                                                  | 13 (3)                             | 7 (4)                              | 5 (2)                               | 1 (1)                             |                     |
|                                 | Right Atrial<br>Isomerism                                                                 | 25 (5)                             | 11 (7)                             | 12 (5)                              | 2 (3)                             |                     |
| Cardiac<br>Position             | Normal                                                                                    | 414 (89)                           | 134 (87)                           | 212<br>(91)                         | 68 (91)                           | 0.02                |
|                                 | Dextrocardia/<br>Mesocardia                                                               | 39 (8)                             | 20 (13)                            | 14 (6)                              | 5 (7)                             |                     |
| Primary<br>Diagnosis            | Tricuspid<br>Atresia                                                                      | 78 (17)                            | 23 (15)                            | 37 (16)                             | 18 (24)                           | 0.32                |
|                                 | DORV                                                                                      | 50 (11)                            | 18 (12)                            | 22 (9)                              | 10 (13)                           |                     |
|                                 | DILV                                                                                      | 68 (15)                            | 25 (16)                            | 37 (16)                             | 6 (8)                             |                     |
|                                 | Pulmonary<br>Atresia with<br>VSD                                                          | 14 (3)                             | 6 (4)                              | 8 (3)                               | 0                                 |                     |
|                                 | ccTGA (VA<br>discordance<br>and AV<br>discordance)                                        | 28 (6)                             | 7 (5)                              | 15 (6)                              | 6 (8)                             |                     |
|                                 | Ebstein's<br>Anomaly                                                                      | 5 (1)                              | 0                                  | 3 (1)                               | 2 (3)                             |                     |
|                                 | Atrioventricular<br>Canal or<br>AVSD (aka<br>unbalanced<br>AVSD or<br>common AV<br>valve) | 47 (10)                            | 20 (13)                            | 20 (9)                              | 7 (9)                             |                     |
|                                 | Pulmonary<br>Atresia with                                                                 | 33 (7)                             | 11 (7)                             | 20 (9)                              | 2 (3)                             |                     |

|                                   |                                      |                     |                     |                     |                     |      |
|-----------------------------------|--------------------------------------|---------------------|---------------------|---------------------|---------------------|------|
|                                   | Intact Ventricular Septum            |                     |                     |                     |                     |      |
|                                   | HLHS                                 | 91 (20)             | 25 (16)             | 48 (21)             | 18 (24)             |      |
|                                   | Other                                | 46 (10)             | 17 (11)             | 23 (10)             | 6 (8)               |      |
| Number Prior Procedures           | 0–1                                  | 85 (18)             | 35 (23)             | 30 (17)             | 10 (13)             | 0.06 |
|                                   | 2                                    | 233 (50)            | 64 (42)             | 123 (53)            | 46 (61)             |      |
|                                   | 3–6                                  | 145 (31)            | 55 (36)             | 71 (30)             | 19 (25)             |      |
| Type Fontan                       | AP                                   | 34 (7)              | 13 (8)              | 17 (7)              | 4 (5)               | 0.01 |
|                                   | ECC                                  | 383 (83)            | 116 (75)            | 197 (84)            | 70 (93)             |      |
|                                   | LT                                   | 42 (9)              | 24 (16)             | 17 (7)              | 1 (1)               |      |
|                                   | Not Entered                          | 4 (1)               | 1 (1)               | 3 (1)               | 0                   |      |
| Conversion                        |                                      | 13 (3)              | 5 (3)               | 7 (3)               | 1 (1)               | 0.86 |
| Fenestration                      |                                      | 159 (38)            | 53 (38)             | 80 (38)             | 26 (37)             | 0.96 |
| Centre                            | Children's Hospital Westmead         | 246 (53)            | 82 (53)             | 128 (55)            | 40 (53)             | 0.61 |
|                                   | Royal Children's Hospital, Melbourne | 213 (46)            | 72 (47)             | 106 (45)            | 35 (47)             |      |
| AV Valve Repair/Replacement       |                                      | 53 (11)             | 19 (12)             | 27 (12)             | 7 (9)               | 0.83 |
| Date of Fontan (Median (IQR))     |                                      | 2010 (2000–2014)    | 2008 (1998–2014)    | 2010 (2001–2014)    | 2012 (2006–2014)    | 0.03 |
| Age at Fontan (Median (IQR))      |                                      | 4.67 (3.96, 5.48)   | 4.86 (4.11, 5.61)   | 4.60 (3.87, 5.39)   | 4.47 (3.93, 5.08)   | 0.47 |
| Age Last Follow-Up (Median (IQR)) |                                      | 13.30 (8.75, 18.14) | 14.47 (9.09, 21.36) | 12.84 (8.49, 17.72) | 11.88 (8.10, 15.73) | 0.46 |

*P*-value indicates comparison between paediatric BMI<sub>6–60month</sub> trajectory groups.

**Table S4. Baseline characteristics of patients by BMI<sub>5-16year</sub> trajectory.**

|                                     |                                                                    | <b>Total<br/>N=458<br/>(N (%))</b> | <b>Lower<br/>N=273<br/>(N (%))</b> | <b>Middle<br/>N=155<br/>(N (%))</b> | <b>Higher<br/>N=30<br/>(N (%))</b> | <b>P-<br/>Value</b> |
|-------------------------------------|--------------------------------------------------------------------|------------------------------------|------------------------------------|-------------------------------------|------------------------------------|---------------------|
| Sex                                 | Male                                                               | 291<br>(64)                        | 165<br>(60)                        | 109<br>(70)                         | 17 (57)                            | 0.08                |
|                                     | Female                                                             | 167<br>(36)                        | 108<br>(40)                        | 46 (30)                             | 13 (43)                            |                     |
| Birthweight (kg)<br>(Mean $\pm$ SD) |                                                                    | 3.27 $\pm$<br>0.62                 | 3.18 $\pm$<br>0.61                 | 3.33 $\pm$<br>0.61                  | 3.62 $\pm$<br>0.68                 | 0.03                |
| Ventricular<br>Morphology           | Left                                                               | 232<br>(51)                        | 126<br>(46)                        | 90 (58)                             | 16 (53)                            | 0.20                |
|                                     | Right                                                              | 166<br>(36)                        | 102<br>(37)                        | 53 (34)                             | 11 (37)                            |                     |
|                                     | Biventricular                                                      | 39 (9)                             | 28 (10)                            | 8 (5)                               | 3 (10)                             |                     |
|                                     | Indeterminate                                                      | 15 (3)                             | 13 (5)                             | 2 (1)                               | 0                                  |                     |
| Isomerism/<br>Heterotaxy            | None                                                               | 418<br>(91)                        | 241<br>(88)                        | 150<br>(97)                         | 27 (90)                            | 0.01                |
|                                     | Left Atrial<br>Isomerism                                           | 11 (2)                             | 9 (3)                              | 2 (1)                               | 0                                  |                     |
|                                     | Right Atrial<br>Isomerism                                          | 25 (5)                             | 21 (8)                             | 1 (1)                               | 3 (10)                             |                     |
| Cardiac Position                    | Normal                                                             | 411<br>(90)                        | 242<br>(89)                        | 139<br>(90)                         | 30<br>(100)                        | 0.07                |
|                                     | Dextrocardia/<br>Mesocardia                                        | 38 (8)                             | 28 (10)                            | 10 (6)                              | 0                                  |                     |
| Primary<br>Diagnosis                | Tricuspid<br>Atresia                                               | 77 (17)                            | 39 (14)                            | 32 (21)                             | 6 (20)                             | 0.53                |
|                                     | DORV                                                               | 52 (11)                            | 31 (11)                            | 17 (11)                             | 4 (13)                             |                     |
|                                     | DILV                                                               | 72 (16)                            | 41 (15)                            | 28 (18)                             | 3 (10)                             |                     |
|                                     | Pulmonary<br>Atresia with<br>VSD                                   | 15 (3)                             | 11 (4)                             | 4 (3)                               | 0                                  |                     |
|                                     | ccTGA (VA<br>discordance<br>and AV<br>discordance)                 | 26 (6)                             | 17 (6)                             | 9 (6)                               | 0                                  |                     |
|                                     | Ebstein's<br>Anomaly                                               | 5 (1)                              | 2 (1)                              | 3 (2)                               | 0                                  |                     |
|                                     | Atrioventricular<br>Canal or<br>AVSD (aka<br>unbalanced<br>AVSD or | 47 (10)                            | 35 (13)                            | 9 (6)                               | 3 (10)                             |                     |

|                                   |                                                  |                     |                     |                     |                      |      |
|-----------------------------------|--------------------------------------------------|---------------------|---------------------|---------------------|----------------------|------|
|                                   | common AV valve)                                 |                     |                     |                     |                      |      |
|                                   | Pulmonary Atresia with Intact Ventricular Septum | 31 (7)              | 17 (6)              | 12 (8)              | 2 (7)                |      |
|                                   | HLHS                                             | 85 (19)             | 50 (18)             | 29 (19)             | 6 (20)               |      |
|                                   | Other                                            | 45 (10)             | 28 (10)             | 11 (7)              | 6 (20)               |      |
| Number Prior Procedures           | 0–1                                              | 97 (21)             | 60 (22)             | 32 (21)             | 5 (17)               | 0.16 |
|                                   | 2                                                | 225 (49)            | 126 (46)            | 78 (50)             | 21 (70)              |      |
|                                   | 3–6                                              | 136 (30)            | 87 (32)             | 45 (29)             | 4 (13)               |      |
| Type Fontan                       | APP                                              | 43 (9)              | 26 (10)             | 15 (10)             | 2 (7)                | 0.76 |
|                                   | ECC                                              | 354 (79)            | 213 (78)            | 124 (80)            | 27 (9)               |      |
|                                   | LT                                               | 49 (11)             | 33 (12)             | 15 (10)             | 1 (3)                |      |
|                                   | Not Entered                                      | 2 (0)               | 1 (0)               | 1 (1)               | 0                    |      |
| Conversion                        |                                                  | 14 (3)              | 9 (3)               | 5 (3)               | 0                    | 0.91 |
| Fenestration                      |                                                  | 159 (39)            | 97 (40)             | 51 (37)             | 11 (39)              | 0.88 |
| Centre                            | Children's Hospital Westmead                     | 140 (52)            | 143 (52)            | 83 (54)             | 14 (47)              | 0.93 |
|                                   | Royal Children's Hospital, Melbourne             | 218 (48)            | 130 (48)            | 72 (46)             | 16 (53)              |      |
| AV Valve Repair/Replacement       |                                                  | 54 (12)             | 32 (12)             | 19 (12)             | 3 (10)               | 0.97 |
| Date of Fontan                    |                                                  | 2009 (1999–2012)    | 2009 (1999–2014)    | 2010 (1999–2014)    | 2010 (2003–2012)     | 0.58 |
| Age at Fontan (Median (IQR))      |                                                  | 4.70 (3.97, 5.52)   | 4.87 (4.13, 5.90)   | 4.45 (3.78, 5.14)   | 4.26 (3.35, 4.97)    | 0.36 |
| Age Last Follow-Up (Median (IQR)) |                                                  | 13.83 (9.36, 18.88) | 14.38 (9.45, 20.09) | 13.14 (8.99, 17.67) | 13.54 (10.58, 17.25) | 0.50 |

*P*-value indicates comparison between paediatric BMI<sub>5-16year</sub> trajectory groups.

**Table S5. Frequency of long-term clinical outcome by BMI<sub>6-60month</sub> trajectory group.**

|                                                      |           | <b>Total<br/>N=463<br/>(N (%))</b> | <b>Lower<br/>N=154<br/>(N (%))</b> | <b>Middle<br/>N=234<br/>(N (%))</b> | <b>Higher<br/>N=75<br/>(N (%))</b> | <b>P-<br/>Value</b> |
|------------------------------------------------------|-----------|------------------------------------|------------------------------------|-------------------------------------|------------------------------------|---------------------|
| Severe Fontan Failure                                |           | 39 (8)                             | 17 (11)                            | 15 (6)                              | 7 (9)                              | 0.25                |
| Time to Severe Fontan Failure (Years) (Median (IQR)) |           | 8.05 (2.51, 22.15)                 | 3.51 (2.07, 18.80)                 | 17.08 (4.78, 22.16)                 | 5.53 (1.10, 6.82)                  | 0.30                |
| Deceased                                             |           | 20 (4)                             | 10 (6)                             | 7 (3)                               | 3 (4)                              | 0.26                |
| Age Deceased (Years) (Median (IQR))                  |           | 20.5 (11.5–29)                     | 20.5 (6–25)                        | 32 (19–35)                          | 13 (5–15)                          | <b>0.05</b>         |
| Transplant                                           |           | 8 (2)                              | 3 (2)                              | 3 (1)                               | 2 (3)                              | 0.64                |
| Takedown                                             |           | 3 (1)                              | 3 (2)                              | 0                                   | 0                                  | 0.07                |
| NYHA III/IV                                          |           | 18 (4)                             | 7 (5)                              | 8 (3)                               | 3 (4)                              | 0.81                |
| Ventricular Function                                 | None-Mild | 220 (90)                           | 76 (89)                            | 114 (91)                            | 30 (88)                            | 0.89                |
|                                                      | Moderate  | 21 (9)                             | 8 (9)                              | 9 (7)                               | 4 (12)                             |                     |
|                                                      | Severe    | 3 (1)                              | 1 (1)                              | 2 (2)                               | 0                                  |                     |
| Valvular Regurgitation                               | Mild      | 198 (81)                           | 7 (82)                             | 99 (79)                             | 29 (85)                            | 0.85                |
|                                                      | Moderate  | 37 (15)                            | 11 (13)                            | 22 (18)                             | 4 (12)                             |                     |
|                                                      | Severe    | 9 (4)                              | 4 (5)                              | 4 (3)                               | 1 (3)                              |                     |

P-value indicates comparison between paediatric BMI<sub>6-60month</sub> trajectory groups.



**Table S6. Frequency of long-term clinical outcome by BMI<sub>5-16year</sub> trajectory.**

|                                                      |           | <b>Total<br/>N=458<br/>(N (%))</b> | <b>Lower<br/>N=273<br/>(N (%))</b> | <b>Middle<br/>N=155<br/>(N (%))</b> | <b>Higher<br/>N=30<br/>(N (%))</b> | <b>P-<br/>Value</b> |
|------------------------------------------------------|-----------|------------------------------------|------------------------------------|-------------------------------------|------------------------------------|---------------------|
| Severe Fontan Failure                                |           | 41 (9)                             | 21 (8)                             | 18 (12)                             | 2 (7)                              | 0.36                |
| Time to Severe Fontan Failure (Years) (Median (IQR)) |           | 8.94 (3.92, 8.93)                  | 12.71 (3.92, 22.15)                | 15.75 (6.82, 22.16)                 | 4.31 (0.80, 8.93)                  | 0.40                |
| Deceased                                             |           | 20 (4)                             | 10 (4)                             | 8 (5)                               | 2 (7)                              | 0.45                |
| Age Decease (Years) (Median (IQR))                   |           | 23 (14.5–30.5)                     | 20.5 (14–32)                       | 22.5 (14.5–27.5)                    | 25.5 (25–26)                       | 0.74                |
| Transplant                                           |           | 11 (2)                             | 5 (2)                              | 6 (4)                               | 0                                  | 0.33                |
| Takedown                                             |           | 1 (0)                              | 0                                  | 1 (1)                               | 0                                  | 0.40                |
| NYHA III/IV                                          |           | 18 (4)                             | 10 (4)                             | 8 (5)                               | 0                                  | 0.45                |
| Ventricular Dysfunction                              | Mild/None | 220 (90)                           | 126 (88)                           | 76 (94)                             | 18 (95)                            | 0.57                |
|                                                      | Moderate  | 22 (9)                             | 16 (11)                            | 5 (6)                               | 1 (5)                              |                     |
|                                                      | Severe    | 2 (1)                              | 2 (1)                              | 0                                   | 0                                  |                     |
| Valvular Regurgitation                               | Mild/None | 198 (81)                           | 113 (78)                           | 71 (88)                             | 14 (74)                            | 0.24                |
|                                                      | Moderate  | 38 (16)                            | 24 (17)                            | 9 (11)                              | 5 (26)                             |                     |
|                                                      | Severe    | 8 (3)                              | 7 (5)                              | 1 (1)                               | 0                                  |                     |

P-value indicates comparison between paediatric BMI<sub>5-16year</sub> trajectory groups.

**Table S7. BMI<sub>5-16years</sub> trajectory according to BMI<sub>0-6months</sub> trajectory (n=357 with data at both 0-6-months and 5-16-years).**

| Change in BMI Trajectory |        | BMI <sub>5-16years</sub>  |                            |                           |                           |
|--------------------------|--------|---------------------------|----------------------------|---------------------------|---------------------------|
|                          |        | Lower<br>(n=204)<br>N (%) | Middle<br>(n=128)<br>N (%) | Higher<br>(n=25)<br>N (%) | Total<br>(n=357)<br>N (%) |
| BMI <sub>0-6months</sub> | Lower  | 24 (12)                   | 8 (6)                      | 1 (4)                     | 33 (9)                    |
|                          | Middle | 141 (69)                  | 74 (58)                    | 12 (48)                   | 227 (64)                  |
|                          | Higher | 39 (19)                   | 46 (36)                    | 12 (48)                   | 97 (27)                   |
